# Supplementary material
Source: Research Square preprint supplement (doi:10.21203/rs.3.rs-9358545/v1)
Supplement: Supplementary file 1 [file 49b039258fb8e0024d4261f7.docx]

**Section A: Owner/Operator**

1. What do you think of the quality of air in this space?
   1. (if bad) What is the cause?
   2. How does it compare to the air outside? In your home?
2. Have you felt any discomfort in your throat/eyes?
   1. When?
3. Do you notice any health impacts when you
   1. Wake up in the morning?
   2. Leave the mill?
4. Have any users reported any impacts or complained in anyway?
5. Does maize dust pose any risks to health?
   1. What? (If so, where did you hear that/why do you think that?)
   2. How have you experienced it?
6. Do you do anything to cope with the dust?
7. How can the air quality be improved?

**Section B: User**

1. What do you think of the quality of air in this space?
   1. (if bad) What is the cause?
   2. How does it compare to the air outside? In your home?
2. Have you felt any discomfort in your throat/eyes?
   1. When?
3. Do you notice any health impacts when you
   1. Wake up in the morning?
   2. Leave the mill?
4. Does maize dust pose any risks to health?
   1. What? (If so, where did you hear that/why do you think that?)
   2. How have you experienced it?
5. Do you do anything to cope with the dust?
6. How can the air quality be improved
