# Supplementary material
Source: Research Square preprint supplement (doi:10.21203/rs.3.rs-9358545/v1)
Supplement: Supplementary file 2 [file aa0edb7fa35149f2b783f46f.docx]

# Respondents List

| **Interview ID** | **Mill** | **Respondent Type** | **Interview Date** |
| --- | --- | --- | --- |
| ID1 | Ambewe | Customer | 11/10/2021 |
| ID2 | Ambewe | Customer | 11/10/2021 |
| ID3 | Ambewe | Customer | 11/10/2021 |
| ID4 | Ambewe | Customer | 11/10/2021 |
| ID5 | Ambewe | Customer | 11/10/2021 |
| ID6 | Ambewe | Customer | 11/10/2021 |
| ID7 | Ambewe | Customer | 11/10/2021 |
| ID8 | Ambewe | Customer | 13/10/2021 |
| ID9 | Ambewe | Customer | 13/10/2021 |
| ID10 | Ambewe | Customer | 13/10/2021 |
| ID11 | Ambewe | Operator | 13/10/2021 |
| ID12 | Ambewe | Operator | 13/10/2021 |
| ID13 | Boundary | Customer | 17/08/2021 |
| ID14 | Boundary | Customer | 17/08/2021 |
| ID15 | Boundary | Customer | 17/08/2021 |
| ID16 | Boundary | Customer | 17/08/2021 |
| ID17 | Boundary | Customer | 17/08/2021 |
| ID18 | Boundary | Customer | 22/08/2021 |
| ID19 | Boundary | Customer | 22/08/2021 |
| ID20 | Boundary | Customer | 22/08/2021 |
| ID21 | Boundary | Customer | 22/08/2021 |
| ID22 | Boundary | Customer | 22/08/2021 |
| ID23 | Boundary | Operator | 22/08/2021 |
| ID24 | Boundary | Operator | 22/08/2021 |
| ID25 | Kapata | Customer | 29/06/2021 |
| ID26 | Kapata | Customer | 29/06/2021 |
| ID27 | Kapata | Customer | 29/06/2021 |
| ID28 | Kapata | Customer | 29/06/2021 |
| ID29 | Kapata | Customer | 05/07/2021 |
| ID30 | Kapata | Customer | 05/07/2021 |
| ID31 | Kapata | Customer | 05/07/2021 |
| ID32 | Kapata | Customer | 05/07/2021 |
| ID33 | Kapata | Customer | 05/07/2021 |
| ID34 | Kapata | Customer | 05/07/2021 |
| ID35 | Kapata | Operator | 05/07/2021 |
| ID36 | Kapata | Operator | 05/07/2021 |
| ID37 | Namacha | Customer | 08/10/2021 |
| ID38 | Namacha | Customer | 08/10/2021 |
| ID39 | Namacha | Customer | 08/10/2021 |
| ID40 | Namacha | Customer | 08/10/2021 |
| ID41 | Namacha | Customer | 08/10/2021 |
| ID42 | Namacha | Customer | 08/10/2021 |
| ID43 | Namacha | Customer | 08/10/2021 |
| ID44 | Namacha | Customer | 09/10/2021 |
| ID45 | Namacha | Customer | 09/10/2021 |
| ID46 | Namacha | Customer | 09/10/2021 |
| ID47 | Namacha | Operator | 09/10/2021 |
| ID48 | Namacha | Operator | 09/10/2021 |
| ID49 | Zonse Zotsala | Customer | 22/11/2021 |
| ID50 | Zonse Zotsala | Customer | 22/11/2021 |
| ID51 | Zonse Zotsala | Customer | 22/11/2021 |
| ID52 | Zonse Zotsala | Customer | 22/11/2021 |
| ID53 | Zonse Zotsala | Customer | 22/11/2021 |
| ID54 | Zonse Zotsala | Customer | 22/11/2021 |
| ID55 | Zonse Zotsala | Customer | 05/12/2021 |
| ID56 | Zonse Zotsala | Customer | 05/12/2021 |
| ID57 | Zonse Zotsala | Customer | 05/12/2021 |
| ID58 | Zonse Zotsala | Customer | 05/12/2021 |
| ID59 | Zonse Zotsala | Operator | 05/12/2021 |
| ID60 | Zonse Zotsala | Operator | 05/12/2021 |
