# Supplementary material
Source: Research Square preprint supplement (doi:10.21203/rs.3.rs-9358545/v1)
Supplement: Supplementary file 3 [file e0723c1e009f1cfcb2c934b5.docx]

*Table 3: Daily PM2.5 and PM10 averages as measured and colour coded against the daily WHO AQI (Namacha Maize Mill)*

| **PM2.5** | | | | | |
| --- | --- | --- | --- | --- | --- |
| **Days** | **30-Mar** | **31-Mar** | **01-Apr** | **02-Apr** | **03-Apr** |
| **Husk** | 8.3 | 6.6 | 47.0 | 3.7 | 3.6 |
| **Top** | 137.6 | 235.0 | 4.0 | 7.1 | 7.0 |
| **Window** | 21.1 | 9.8 | 4.8 | 37.2 | 7.1 |
| **PM10** | | | | | |
| **Husk** | 18.1 | 15.3 | 72.1 | 14.6 | 14.3 |
| **Top** | 198.3 | 377.6 | 15.1 | 17.9 | 17.9 |
| **Window** | 35.5 | 20.8 | 16.1 | 59.2 | 15.9 |

*Table 4: Daily PM2.5 and PM10 averages as measured and colour coded against the daily WHO AQI (Boundary Maize Mill)*

| **PM2.5** | | | | | | |
| --- | --- | --- | --- | --- | --- | --- |
| **Days** | 07-Apr | 08-Apr | 09-Apr | 10-Apr | 12-Apr | 13-Apr |
| **Husk** | 10.8 | 15.3 | 0.7 | No data | 1.5 | 2.3 |
| **Top** | 35.9 | 7.0 | 13.0 | 21.0 | 18.6 | 59.0 |
| **Window** | 12.9 | 4.2 | 8.5 | 6.8 | No data | No data |
| **PM10** | | | | | | |
| **Husk** | 23.6 | 27.8 | 2.9 | No data | 5.3 | 7.1 |
| **Top** | 64.9 | 23.1 | 28.6 | 45.5 | 45.9 | 92.2 |
| **Window** | 36.0 | 16.7 | 22.0 | 18.8 | No data | No data |

*Table 5: Daily PM2.5 and PM10 averages as measured and colour coded against the daily WHO AQI (Zonse Zotsala Maize Mill)*

| **PM2.5** | | | | | |
| --- | --- | --- | --- | --- | --- |
| **Days** | **20-May** | **21-May** | **22-May** | **24-May** | **25-May** |
| **Husk** | 110.4 | 80.0 | 29.7 | 23.9 | 9.1 |
| **Top** | 66.6 | 34.3 | 28.4 | 23.5 | No data |
| **Window** | 64.4 | 124.2 | 33.7 | 26.2 | 83.3 |
| **PM10** | | | | | |
| **Husk** | 271.9 | 115.2 | 124.8 | 71.8 | 54.1 |
| **Top** | 228.6 | 113.2 | 62.9 | 84.8 | No data |
| **Window** | 206.0 | 212.3 | 111.2 | 51.2 | 163.6 |

*Table 6: Daily PM2.5 and PM10 averages as measured and colour coded against the daily WHO AQI (Ambewe Maize Mill)*

| **PM2.5** | | | | | | |
| --- | --- | --- | --- | --- | --- | --- |
| **Days** | **24-May** | **25-May** | **26-May** | **31-May** | **01-Jun** | **02-Jun** |
| **Husk** | No data | 83.3 | 46.1 | 6.0 | 14.4 | 8.6 |
| **Top** | 23.5 | No data | No data | 16.9 | 7.2 | 15.9 |
| **Window** | 19.9 | 23.9 | 9.1 | 2.7 | 15.5 | 15.4 |
| **PM10** | | | | | | |
| **Husk** | No data | 163.6 | 142.6 | 18.4 | 37.5 | 24.4 |
| **Top** | 84.8 | No data | No data | 35.6 | 21.8 | 38.7 |
| **Window** | 44.8 | 71.8 | 54.1 | 9.0 | 29.8 | 33.0 |

*Table 7: Table showing the daily PM2.5 and PM10 averages as measured and colour coded against the daily WHO AQI (Kapata Maize Mill)*

| **PM2.5** | | | | | | |
| --- | --- | --- | --- | --- | --- | --- |
| **Days** | 21-Jun | 22-Jun | 23-Jun | 24-Jun | 25-Jun | 26-Jun |
| **Husk** | 24.7 | 13.8 | 21.6 | 15.0 | No data | No data |
| **Top** | 19.0 | 11.8 | 19.1 | 15.7 | 23.3 | 14.1 |
| **Window** | 49.0 | 40.7 | 50.8 | 45.7 | 19.8 | 11.4 |
| **PM10** | | | | | | |
| **Husk** | 99.5 | 32.8 | 55.8 | 27.8 | No data | No data |
| **Top** | 55.8 | 55.7 | 70.1 | 33.7 | 58.0 | 26.9 |
| **Window** | 124.4 | 99.3 | 85.7 | 75.3 | 52.7 | 23.4 |
